# Supplementary material for: Identification of Metabolic Signature Associated with Idiopathic Inflammatory Myopathy Reveals Polyamine Pathway Alteration in Muscle Tissue
Source: MDPI journal article supplement (doi:10.3390/metabo12101004), 2022-10-21

## SUPPLEMENTARY MATERIALS

### Supplementary Table and Figure Legends

Table S1. Detailed list of all metabolites.

Table S2. List of significant metabolites in human serum. Statistical analysis was performed using one-way analysis of variance (ANOVA).

Table S3. List of IIM specific metabolites.

Table S4. List of significant metabolites in mouse tissue. Statistical analysis was performed using t-test.

Table S5. List of significant metabolites in mouse serum. Statistical analysis was performed using t-test.

Table S6. Significantly altered pathway using enrichment analysis in mouse tissue.

Figure S1. Study workflow

Figure S2. Cluster heatmap for significant metabolites in IIM. A, including amino acid, biogenic amine, acylcarnitine class and B, SMs, lysoPCs, PC, and hexoses.

Figure S3. ROC curves and AUC values of a set of 7 metabolites panel in prediction model for discriminating IIM patients.

Figure S4. Increased production of cytokines TNF- $\alpha$ , IL-6, and IL-1 in CIM compared to control.

Figure S5. Heatmap of significant metabolites with all mice skeletal muscle samples.

Figure S6. Metabolic profiles in mouse serum samples. A, PCA plot of control and CIM skeletal muscle serum. B, Volcano plot from t-test results of control and CIM. C, Heatmap of significant metabolites with all mice serum samples.

Figure S7. MetaMapp metabolomic networks of mouse serum altered in CIM compared to control. Border color and node color: red indicates up-regulation in IIM or CIM-vehicle, blue indicates down-regulation in IIM or CIM-vehicle. Node size indicates FDR-adjusted p-value.

Figure S8. Pathway enrichment dot plot.

Table S1. List of significant metabolites in human serum. Statistical analysis was performed using one-way analysis of variance (ANOVA).

| Metabolites    | FDR-adjusted p-value |
|----------------|----------------------|
| Met-SO         | 4.49E-06             |
| PC aa C38:4    | 1.55E-05             |
| Glu            | 3.55E-05             |
| PC ae C38:0    | 8.07E-05             |
| PC aa C38:6    | 8.07E-05             |
| PC aa C38:1    | 8.07E-05             |
| PC ae C36:1    | 8.07E-05             |
| PC aa C42:4    | 8.58E-05             |
| PC ae C38:6    | 8.58E-05             |
| PC aa C40:6    | 8.58E-05             |
| PC aa C24:0    | 0.0001               |
| lysoPC a C24:0 | 0.0002               |
| PC ae C38:2    | 0.0002               |
| PC ae C38:5    | 0.0002               |
| PC aa C36:4    | 0.0003               |
| Gln            | 0.0003               |
| Kynurenine     | 0.0003               |
| C2             | 0.0003               |
| PC ae C36:5    | 0.0003               |
| PC aa C38:5    | 0.0003               |
| PC aa C42:5    | 0.0005               |
| PC aa C36:0    | 0.0005               |
| PC ae C42:4    | 0.0006               |
| PC ae C40:5    | 0.0006               |
| PC aa C40:3    | 0.0006               |
| lysoPC a C26:0 | 0.0006               |
| PC aa C42:2    | 0.0009               |

|                |        |
|----------------|--------|
| PC ae C30:2    | 0.0009 |
| Serotonin      | 0.0010 |
| Asp            | 0.0011 |
| PC aa C40:1    | 0.0011 |
| PC aa C40:2    | 0.0021 |
| Met            | 0.0022 |
| Phe            | 0.0024 |
| lysoPC a C20:4 | 0.0026 |
| PC ae C42:5    | 0.0026 |
| PC ae C40:6    | 0.0026 |
| Ile            | 0.0026 |
| Ala            | 0.0026 |
| Leu            | 0.0026 |
| PC ae C44:3    | 0.0026 |
| Ser            | 0.0027 |
| ADMA           | 0.0027 |
| PC ae C44:4    | 0.0027 |
| SM C26:0       | 0.0037 |
| Pro            | 0.0039 |
| SM (OH) C22:2  | 0.0040 |
| PC ae C36:4    | 0.0040 |
| C14:1          | 0.0040 |
| lysoPC a C28:0 | 0.0040 |
| lysoPC a C17:0 | 0.0041 |
| Orn            | 0.0041 |
| PC ae C30:0    | 0.0042 |
| PC aa C42:1    | 0.0042 |
| PC ae C40:2    | 0.0042 |
| Lys            | 0.0042 |
| PC ae C38:3    | 0.0042 |
| PC ae C42:3    | 0.0043 |
| PC aa C30:2    | 0.0043 |
| lysoPC a C28:1 | 0.0043 |
| PC aa C40:4    | 0.0052 |
| Val            | 0.0057 |
| SM (OH) C22:1  | 0.0061 |
| PC ae C40:4    | 0.0063 |
| PC aa C38:3    | 0.0077 |
| PC ae C30:1    | 0.0094 |
| Creatinine     | 0.0100 |

|                |        |
|----------------|--------|
| Taurine        | 0.0112 |
| Tyr            | 0.0112 |
| Gly            | 0.0135 |
| PC ae C38:0    | 0.0151 |
| lysoPC a C16:0 | 0.0151 |
| alpha-AAA      | 0.0151 |
| PC ae C40:3    | 0.0169 |
| SM (OH) C24:1  | 0.0170 |
| Putrescine     | 0.0173 |
| PC ae C36:2    | 0.0173 |
| PC ae C42:1    | 0.0179 |
| PC aa C40:5    | 0.0183 |
| PC ae C42:2    | 0.0232 |
| PC aa C32:0    | 0.0308 |
| PC aa C42:6    | 0.0330 |
| t4-OH-Pro      | 0.0333 |
| lysoPC a C18:0 | 0.0361 |
| lysoPC a C16:1 | 0.0422 |
| SM (OH) C14:1  | 0.0430 |
| PC aa C36:3    | 0.0439 |
| PC ae C36:0    | 0.0439 |

Table S2. Detailed list of all metabolites.

| Metabolite abbreviation | Full name       | HMDB ID     |
|-------------------------|-----------------|-------------|
| Ala                     | L-Alanine       | HMDB0000161 |
| Arg                     | L-Arginine      | HMDB0000517 |
| Asn                     | L-Asparagine    | HMDB0000168 |
| Asp                     | L-Aspartic acid | HMDB0000191 |
| Cit                     | Citrulline      | HMDB0000904 |
| Gln                     | L-Glutamine     | HMDB0000641 |
| Glu                     | L-Glutamic acid | HMDB0000148 |
| Gly                     | Glycine         | HMDB0000123 |
| His                     | L-Histidine     | HMDB0000177 |
| Ile                     | L-Isoleucine    | HMDB0000172 |
| Leu                     | L-Leucine       | HMDB0000687 |

|            |                             |             |
|------------|-----------------------------|-------------|
| Lys        | L-Lysine                    | HMDB0000182 |
| Met        | L-Methionine                | HMDB0000696 |
| Orn        | Ornithine                   | HMDB0000214 |
| Phe        | L-Phenylalanine             | HMDB0000159 |
| Pro        | L-Proline                   | HMDB0000162 |
| Ser        | L-Serine                    | HMDB0000187 |
| Thr        | L-Threonine                 | HMDB0000167 |
| Trp        | L-Tryptophan                | HMDB0000929 |
| Tyr        | L-Tyrosine                  | HMDB0000158 |
| Val        | L-Valine                    | HMDB0000883 |
| Ac-Orn     | N-Acetylornithine           | HMDB0003357 |
| ADMA       | Asymmetric dimethylarginine | HMDB0001539 |
| alpha-AAA  | Aminoadipic acid            | HMDB0000510 |
| c4-OH-Pro  | cis-4-Hydroxyproline        | HMDB0240251 |
| Carnosine  | Carnosine                   | HMDB0000033 |
| Creatinine | Creatinine                  | HMDB0000562 |
| DOPA       | L-Dopa                      | HMDB0000181 |
| Dopamine   | Dopamine                    | HMDB0000073 |
| Histamine  | Histamine                   | HMDB0000870 |
| Kynurenine | L-Kynurenine                | HMDB0000684 |
| Met-SO     | Methionine sulfoxide        | HMDB0002005 |
| Nitro-Tyr  | 3-Nitrotyrosine             | HMDB0001904 |
| PEA        | Phenylethylamine            | HMDB0012275 |
| Putrescine | Putrescine                  | HMDB0001414 |
| SDMA       | Symmetric dimethylarginine  | HMDB0003334 |
| Serotonin  | Serotonin                   | HMDB0000259 |
| Spermidine | Spermidine                  | HMDB0001257 |
| Spermine   | Spermine                    | HMDB0001256 |
| t4-OH-Pro  | 4-Hydroxyproline            | HMDB0000725 |
| Taurine    | Taurine                     | HMDB0000251 |

Table S3. List of IIM specific metabolites.

| Metabolite     | IIM          | AS           | Healthy control | ANOVA(FD R-adjusted p-value) | Post-hoc analysis |
|----------------|--------------|--------------|-----------------|------------------------------|-------------------|
| Ala            | 723.84±46.99 | 566.23±43.33 | 480.5±36.72     | 0.0026                       | **, †             |
| Asp            | 157.89±19.58 | 82.03±14.32  | 44.66±3.84      | 0.0011                       | ***, †            |
| Glu            | 650.62±46.49 | 397.02±51.95 | 242.4±33.14     | 0.0000                       | ****, ††††        |
| Orn            | 224.1±16.49  | 162.05±11.65 | 130.57±9.14     | 0.0041                       | **, †             |
| Val            | 406.22±26.74 | 330.53±24.58 | 291.9±12.19     | 0.0057                       | *, †              |
| Met-SO         | 39.36±4.47   | 22.42±7.25   | 2.3±0.44        | 0.0000                       | ****, ††††        |
| Serotonin      | 0.31±0.02    | 0.48±0.05    | 0.56±0.08       | 0.0010                       | **, ††            |
| lysoPC a C20:4 | 4.54±0.23    | 5.53±0.28    | 6.75±0.72       | 0.0026                       | **, †             |
| lysoPC a C24:0 | 0.53±0.03    | 0.33±0.04    | 0.16±0.05       | 0.0002                       | ***, ††           |
| lysoPC a C26:0 | 0.76±0.08    | 0.5±0.09     | 0.16±0.03       | 0.0006                       | ***, †            |
| PC aa C24:0    | 0.31±0.02    | 0.17±0.02    | 0.1±0.02        | 0.0001                       | ***, ††††         |
| PC aa C36:0    | 6.84±0.46    | 4.68±0.4     | 3.72±0.39       | 0.0005                       | **, ††            |
| PC aa C36:4    | 76.98±3.22   | 102.41±5.25  | 111.26±9.39     | 0.0003                       | **, ††††          |
| PC aa C38:1    | 4.68±0.37    | 2.54±0.42    | 2.4±0.37        | 0.0001                       | *, †††††          |
| PC aa C38:4    | 41.43±1.71   | 64.67±3.91   | 68.59±6.37      | 0.0000                       | ***, †††††        |
| PC aa C38:5    | 24.48±1.35   | 36.09±2.74   | 39.76±3.87      | 0.0003                       | **, ††††          |
| PC aa C38:6    | 48.14±2.57   | 67±5.12      | 88.33±4.36      | 0.0001                       | ****, ††          |
| PC aa C40:3    | 2.46±0.16    | 1.68±0.18    | 1.11±0.16       | 0.0006                       | ***, †            |
| PC aa C40:4    | 4.94±0.26    | 3.75±0.25    | 3.44±0.47       | 0.0052                       | *, ††             |
| PC aa C40:6    | 18.82±1.09   | 29.84±2.68   | 32.73±1.76      | 0.0001                       | ***, ††††         |
| PC aa C42:1    | 0.48±0.03    | 0.37±0.03    | 0.32±0.03       | 0.0042                       | *, †              |
| PC aa C42:2    | 0.9±0.05     | 0.59±0.05    | 0.55±0.07       | 0.0009                       | *, ††††           |
| PC aa C42:4    | 1.3±0.08     | 0.79±0.08    | 0.59±0.1        | 0.0001                       | ***, ††††         |
| PC aa C42:5    | 0.73±0.03    | 0.52±0.04    | 0.5±0.06        | 0.0005                       | *, ††††           |
| PC ae C30:2    | 0.25±0.01    | 0.16±0.02    | 0.14±0.02       | 0.0009                       | **, ††            |

|               |            |           |                |        |               |
|---------------|------------|-----------|----------------|--------|---------------|
| PC ae C36:1   | 22.43±1.44 | 13.97±1.5 | 9.73±0.85      | 0.0001 | ***,<br>††††  |
| PC ae C36:4   | 8.55±0.49  | 11.1±0.8  | 12.3±1.04      | 0.0040 | **, †         |
| PC ae C36:5   | 5.53±0.31  | 7.55±0.5  | 8.86±0.77      | 0.0003 | ***,<br>††    |
| PC ae C38:0   | 9.63±0.77  | 5.43±0.82 | 3.01±0.44      | 0.0001 | ****,<br>†††† |
| PC ae C38:2   | 9.41±0.64  | 6.12±0.82 | 3.68±0.47      | 0.0002 | ***,<br>††    |
| PC ae C38:3   | 13.71±0.77 | 9.76±1.1  | 8.55±1.37      | 0.0042 | *, ††         |
| PC ae C38:5   | 7.22±0.37  | 9.94±0.65 | 11.52±1.1<br>2 | 0.0002 | ***,<br>††††  |
| PC ae C38:6   | 3.9±0.25   | 5.71±0.47 | 6.66±0.4       | 0.0001 | ***,<br>††††  |
| PC ae C42:3   | 1.85±0.09  | 1.4±0.11  | 1.21±0.14      | 0.0043 | *, †          |
| PC ae C42:4   | 1.76±0.08  | 1.23±0.09 | 1.29±0.15      | 0.0006 | *, ††††       |
| PC ae C44:4   | 0.53±0.02  | 0.44±0.02 | 0.36±0.03      | 0.0027 | **, †         |
| SM (OH) C24:1 | 0.95±0.04  | 1.08±0.05 | 1.15±0.08      | 0.0170 | *, †          |

Concentration of each group represented as mean ± SEM. Comparing Healthy control vs IIM,

\* p < 0.05; \*\* p < 0.005; \*\*\* p < 0.0005, \*\*\*\* p < 0.0001. Comparing AS vs IIM, † p < 0.05;

†† p < 0.005; ††† p < 0.0005, †††† p < 0.0001. Listed metabolites were not significantly

different between healthy control and AS.



Table S4. List of significant metabolites in mouse tissue. Statistical analysis was performed using t-test.

| Metabolites   | Fold change | FDR-adjusted p-value |
|---------------|-------------|----------------------|
| PC ae C36:2   | 3.1         | 0.0122               |
| PC ae C34:2   | 3.1         | 0.0122               |
| PC ae C36:3   | 3.0         | 0.0122               |
| PC aa C34:3   | 2.8         | 0.0122               |
| PC aa C36:2   | 3.5         | 0.0139               |
| PC aa C34:2   | 2.4         | 0.0139               |
| Creatinine    | 0.5         | 0.0139               |
| PC aa C36:1   | 3.5         | 0.0171               |
| PC aa C40:4   | 3.2         | 0.0171               |
| PC aa C32:0   | 2.9         | 0.0171               |
| PC ae C34:3   | 2.8         | 0.0171               |
| PC aa C34:1   | 2.6         | 0.0171               |
| PC aa C32:2   | 2.6         | 0.0171               |
| PC ae C34:1   | 2.6         | 0.0171               |
| PC ae C38:5   | 2.5         | 0.0171               |
| PC ae C36:4   | 2.3         | 0.0171               |
| SM C16:0      | 2.1         | 0.0171               |
| Carnosine     | 0.5         | 0.0171               |
| C0            | 0.5         | 0.0171               |
| SM (OH) C24:1 | 1.7         | 0.0171               |
| PC ae C36:5   | 3.1         | 0.0195               |
| PC aa C40:5   | 3.1         | 0.0195               |
| PC aa C36:3   | 2.7         | 0.0195               |
| PC aa C36:0   | 2.6         | 0.0195               |
| PC ae C32:1   | 2.4         | 0.0195               |
| PC ae C36:1   | 2.4         | 0.0195               |
| PC aa C32:1   | 2.3         | 0.0195               |
| C18:1         | 0.5         | 0.0195               |
| PC ae C30:1   | 1.8         | 0.0195               |
| Taurine       | 1.1         | 0.0195               |
| C18:1-OH      | 0.6         | 0.0228               |
| C16:1         | 0.4         | 0.0238               |
| PC aa C38:4   | 2.5         | 0.0238               |
| PC ae C38:2   | 2.4         | 0.0238               |
| PC ae C34:0   | 2.3         | 0.0238               |

|               |     |        |
|---------------|-----|--------|
| PC aa C38:1   | 2.2 | 0.0238 |
| PC ae C32:2   | 2.2 | 0.0238 |
| PC aa C42:4   | 1.9 | 0.0238 |
| SM (OH) C16:1 | 1.8 | 0.0238 |
| PC aa C38:0   | 2.5 | 0.0255 |
| PC aa C40:2   | 2.5 | 0.0283 |
| C18:2         | 0.3 | 0.0293 |
| SM C24:1      | 2.8 | 0.0293 |
| SM (OH) C22:1 | 2.7 | 0.0293 |
| PC aa C38:3   | 2.4 | 0.0293 |
| PC aa C40:6   | 2.4 | 0.0293 |
| PC ae C38:6   | 2.2 | 0.0293 |
| PC ae C42:1   | 2.0 | 0.0293 |
| Met           | 0.7 | 0.0293 |
| Tyr           | 0.7 | 0.0293 |
| PC ae C30:0   | 3.0 | 0.0313 |
| PC aa C30:2   | 1.6 | 0.0359 |
| Asp           | 0.4 | 0.0364 |
| PC aa C42:5   | 1.9 | 0.0364 |
| PC ae C36:0   | 1.8 | 0.0364 |
| Spermine      | 0.3 | 0.0372 |
| Spermidine    | 0.5 | 0.0372 |
| PC ae C38:4   | 1.9 | 0.0372 |
| His           | 0.6 | 0.0372 |
| SM (OH) C22:2 | 2.3 | 0.0460 |
| SM C24:0      | 2.8 | 0.0474 |
| C14:1         | 0.5 | 0.0474 |
| SM (OH) C14:1 | 1.9 | 0.0474 |
| C16:1-OH      | 0.6 | 0.0474 |
| PC ae C38:0   | 1.6 | 0.0474 |
| C2            | 0.6 | 0.0474 |
| Thr           | 0.7 | 0.0474 |
| PC ae C40:4   | 1.3 | 0.0474 |

Table S5. List of significant metabolites in mouse serum. Statistical analysis was performed using t-test.

| Metabolites    | Fold change | FDR-adjuted p-value |
|----------------|-------------|---------------------|
| lysoPC a C20:4 | 0.3         | 3.E-05              |
| lysoPC a C20:3 | 0.5         | 0.0002              |
| t4-OH-Pro      | 1.7         | 0.0004              |
| Trp            | 0.6         | 0.0005              |
| lysoPC a C17:0 | 0.6         | 0.0007              |
| PC ae C34:1    | 1.5         | 0.0007              |
| lysoPC a C18:2 | 0.5         | 0.0007              |
| Carnosine      | 0.3         | 0.0007              |
| lysoPC a C18:1 | 0.6         | 0.0010              |
| lysoPC a C16:0 | 0.7         | 0.0012              |
| Arg            | 1.7         | 0.0012              |
| PC aa C40:2    | 1.8         | 0.0016              |
| lysoPC a C16:1 | 0.7         | 0.0034              |
| H1             | 0.6         | 0.0036              |
| PC aa C42:4    | 1.6         | 0.0038              |
| PC ae C40:1    | 0.6         | 0.0038              |
| lysoPC a C18:0 | 0.7         | 0.0038              |
| ADMA           | 1.6         | 0.0043              |
| PC aa C36:0    | 0.7         | 0.0049              |
| SM C26:0       | 0.6         | 0.0067              |
| PC ae C38:0    | 0.7         | 0.0078              |
| PC ae C36:5    | 0.7         | 0.0093              |
| SM C18:0       | 0.7         | 0.0110              |
| PC aa C32:1    | 1.5         | 0.0175              |
| PC aa C30:0    | 1.2         | 0.0184              |
| SM C16:0       | 1.3         | 0.0216              |
| SM C24:1       | 1.3         | 0.0216              |
| PC ae C32:1    | 1.3         | 0.0244              |
| PC aa C36:6    | 0.8         | 0.0277              |
| lysoPC a C24:0 | 0.6         | 0.0279              |
| PC aa C36:4    | 0.6         | 0.0279              |
| SM C18:1       | 0.7         | 0.0344              |
| PC ae C42:3    | 0.7         | 0.0458              |
| C0             | 0.8         | 0.0458              |
| Creatinine     | 0.8         | 0.0458              |
| SM (OH) C22:2  | 0.8         | 0.0458              |
| PC aa C38:4    | 0.6         | 0.0488              |

Table S6. Significantly altered pathway using enrichment analysis in mouse tissue.

| Pathway                 | Total | Hit | Metabolites                                                   | P-value |
|-------------------------|-------|-----|---------------------------------------------------------------|---------|
| Beta-Alanine metabolism | 21    | 5   | L-Aspartic acid, Carnosine, Spermine, L-Histidine, Spermidine | 0.0018  |
| Histidine metabolism    | 16    | 4   | L-Histidine, L-Aspartic acid, Carnosine                       | 0.0315  |

Figure S1. Study workflow

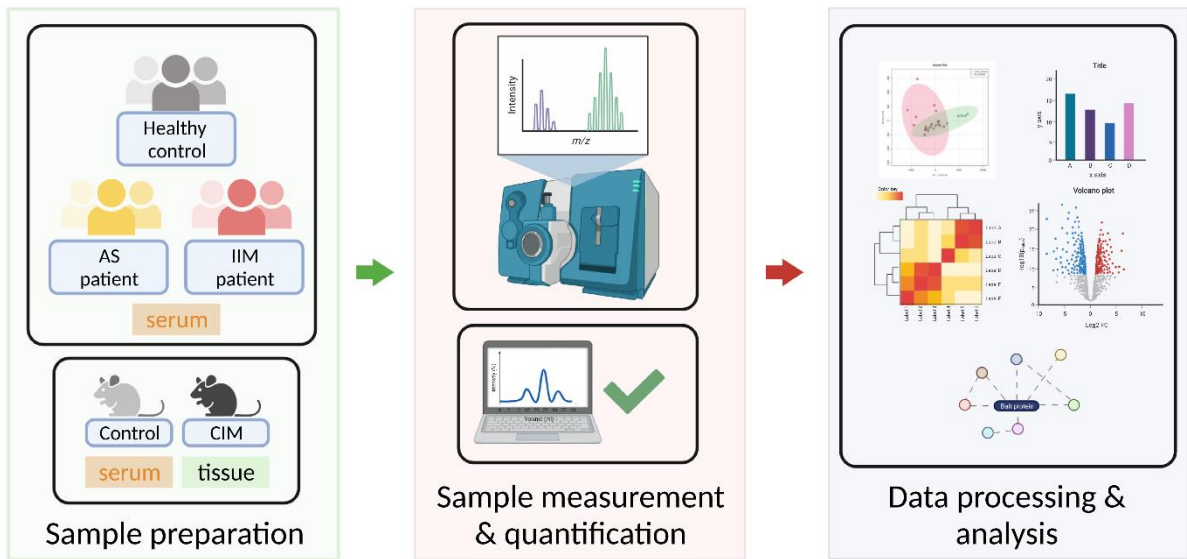

Figure S2. Cluster heatmap for significant metabolites in IIM. A, including amino acid, biogenic amine, acylcarnitine class and B, SMs, lysoPCs, PC, and hexoses.

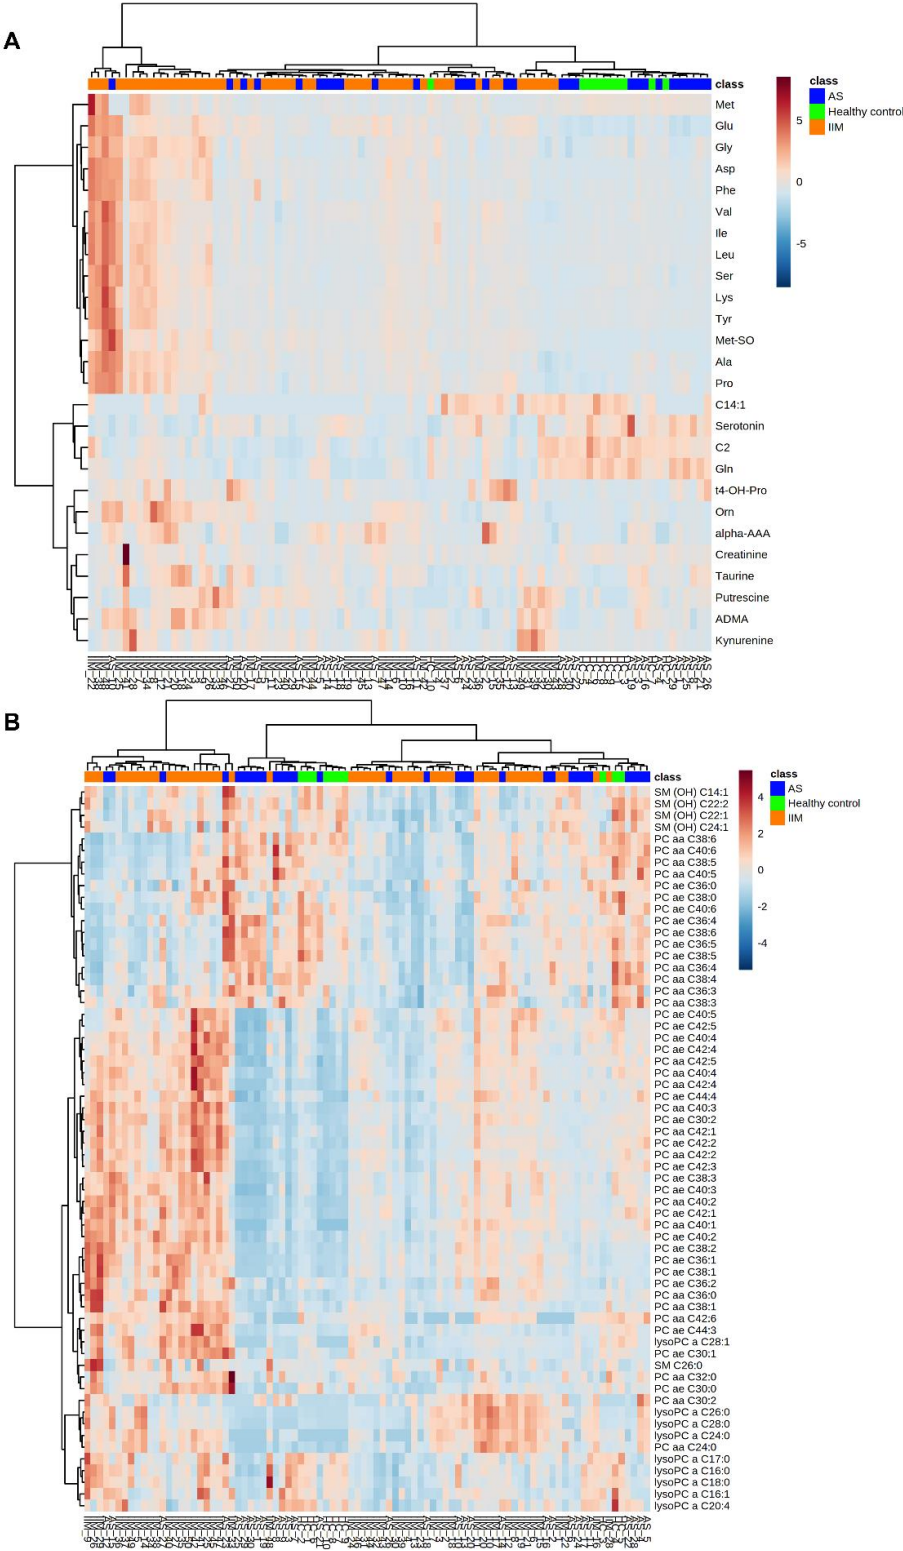

Figure S3. ROC curves and AUC values of a set of 7 metabolites panel in prediction model for discriminating IIM patients.

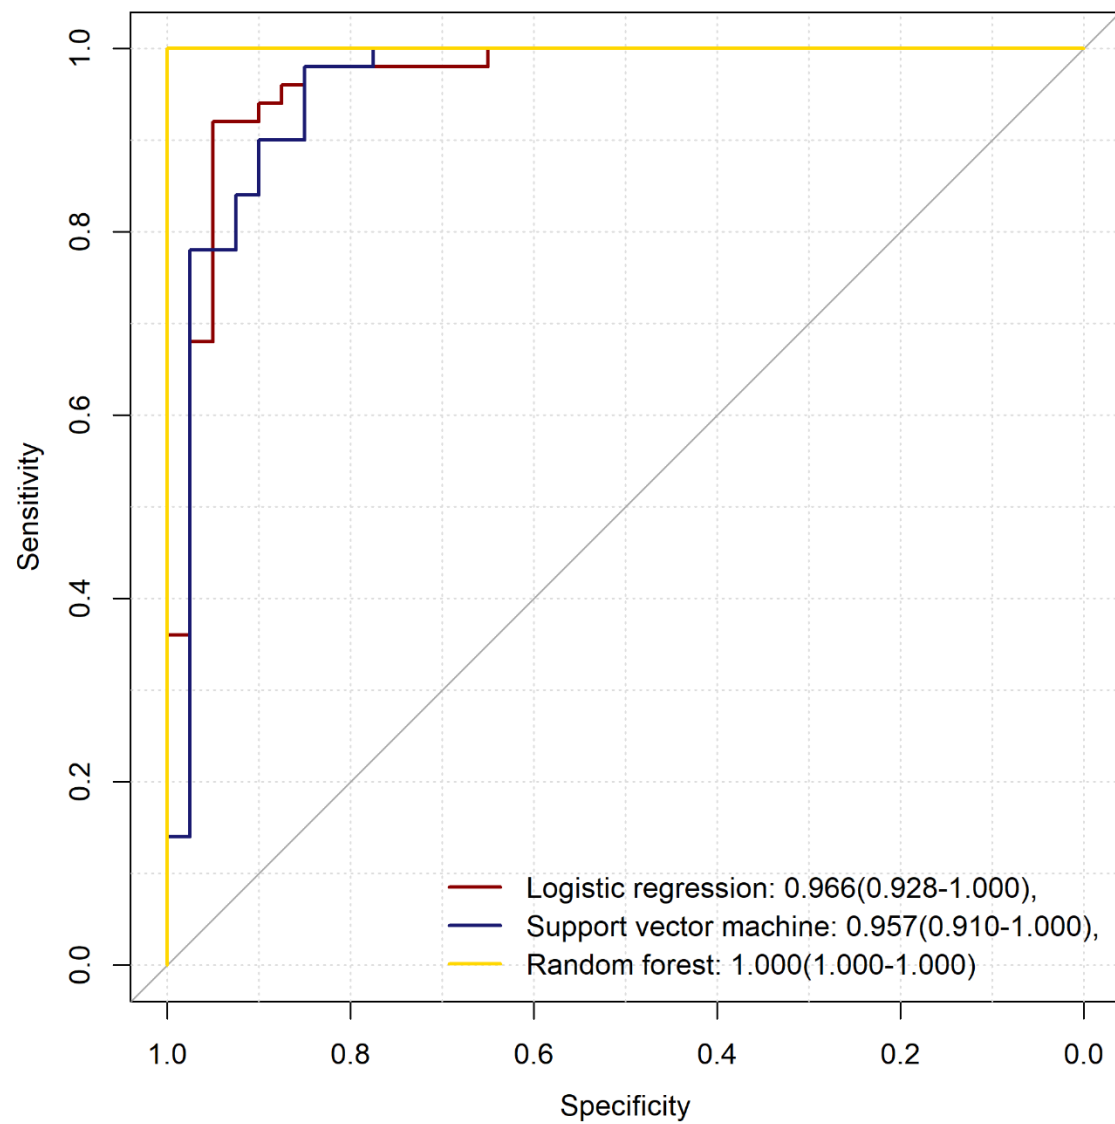

Figure S4. Increased production of cytokines TNF- $\alpha$ , IL-6, and IL-1 in serum of mouse model.

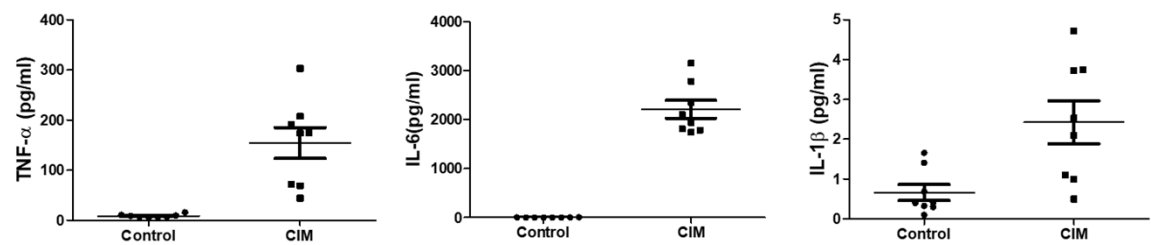



Figure S5. Heatmap of significant metabolites with all mice skeletal muscle samples.

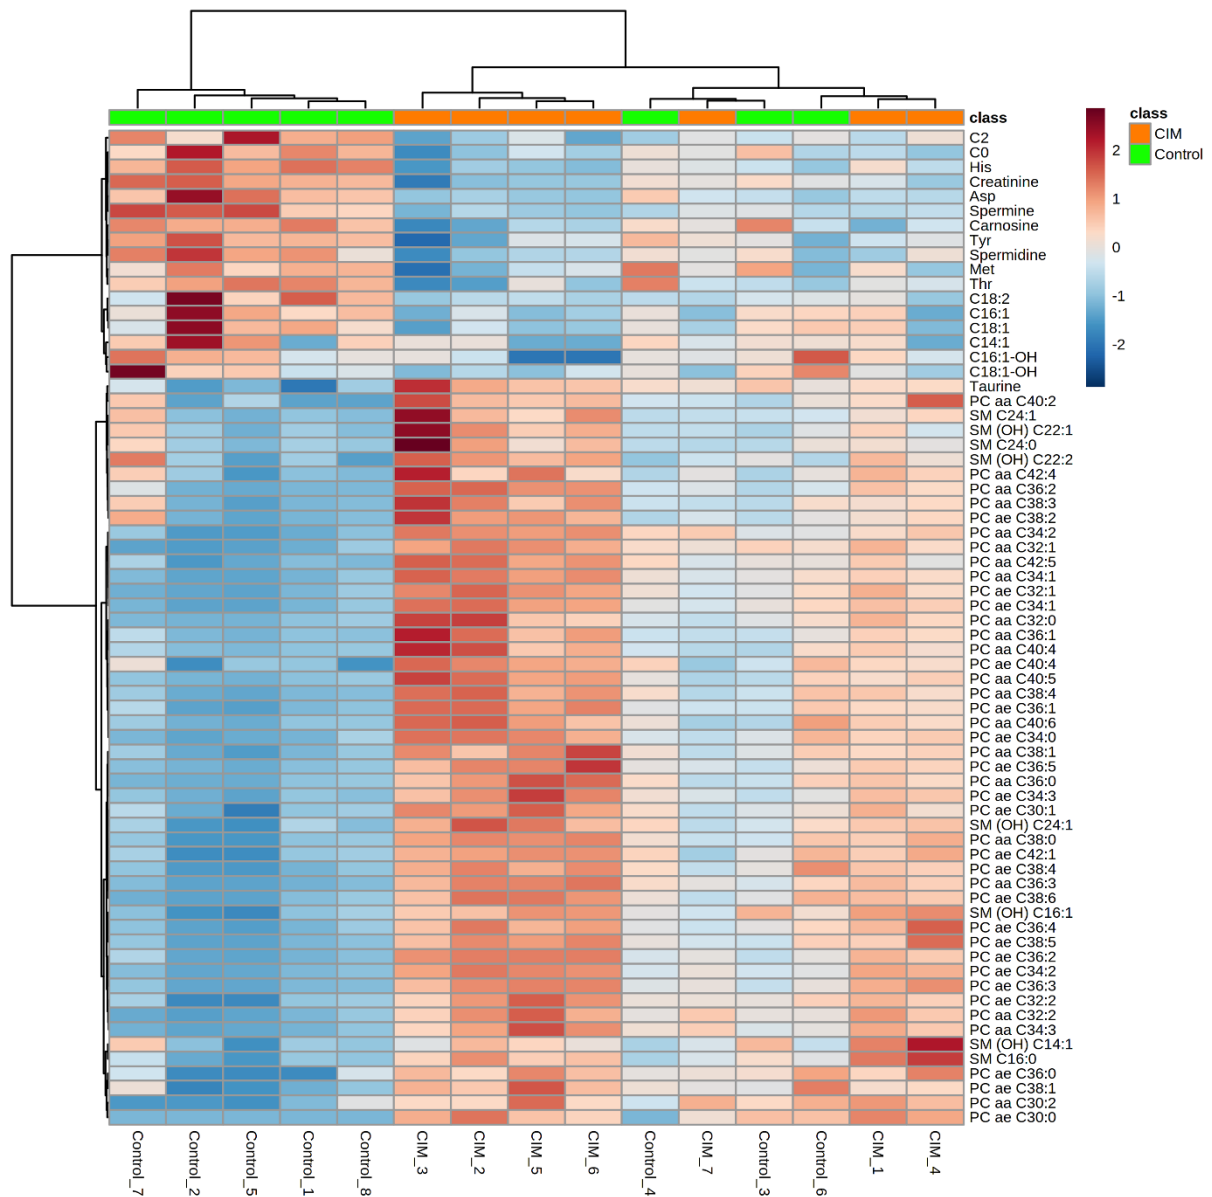

Figure S6. Metabolic profiles in mouse serum samples. A, PCA plot of control and CIM skeletal muscle serum. B, Volcano plot from t-test results of control and CIM. C, Heatmap of significant metabolites with all mice serum samples.

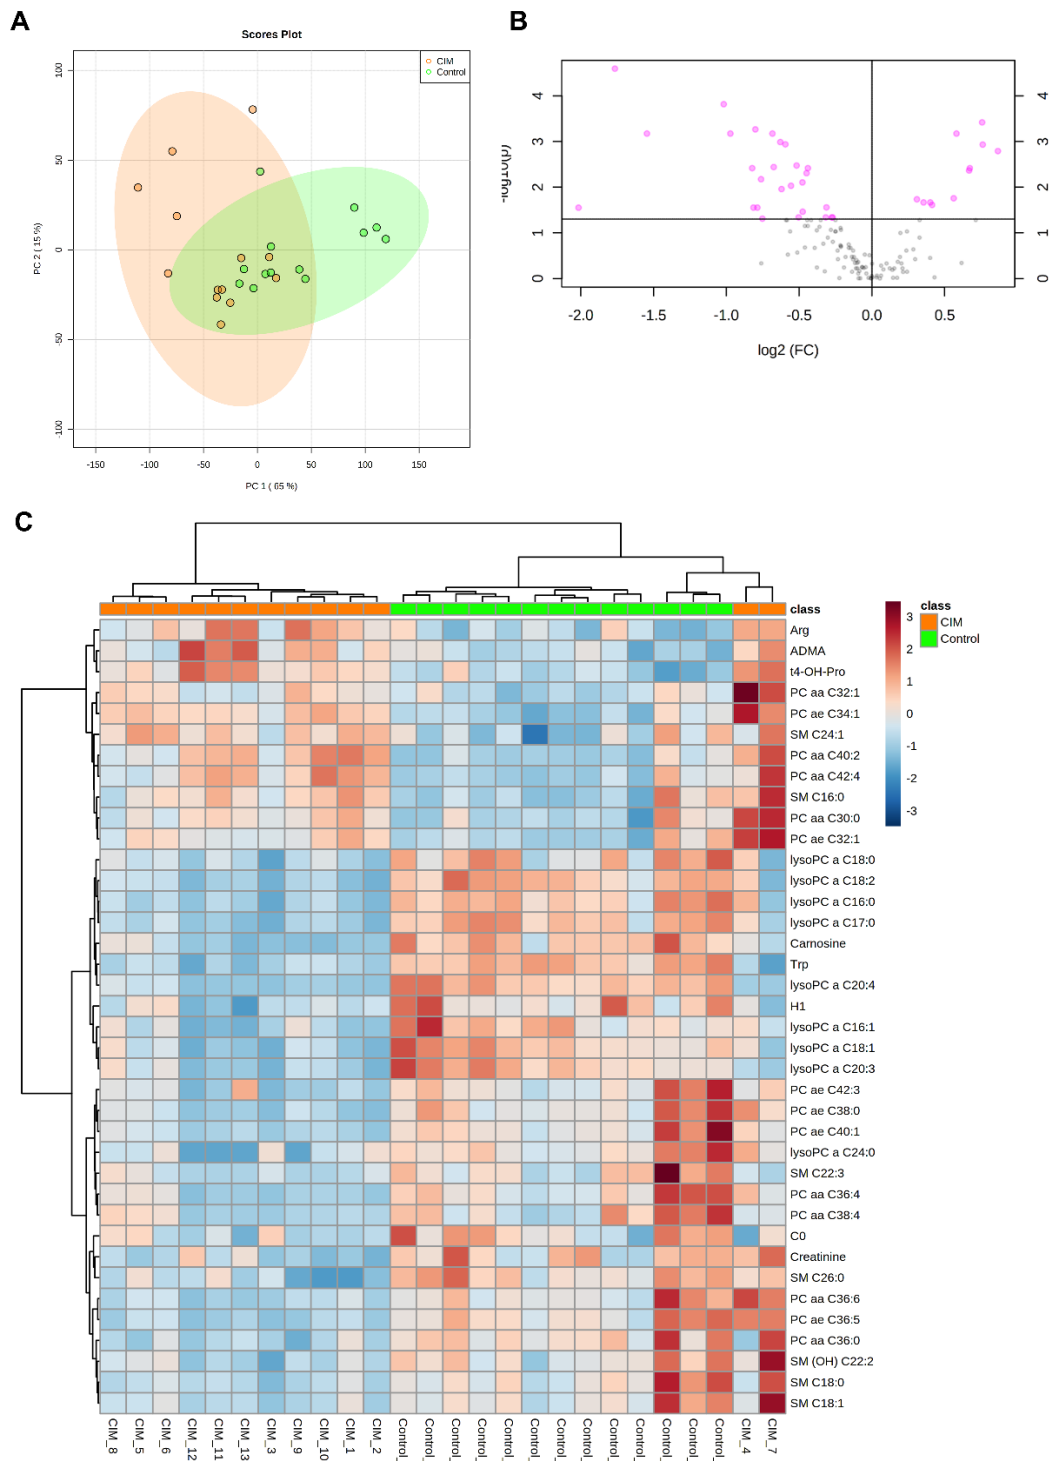

Figure S7. MetaMapp metabolomic networks of mouse serum altered in CIM compared to control. Border color and node color: red indicates up-regulation in CIM, blue indicates down-regulation in IIM. Node size indicates FDR-adjusted p-value.

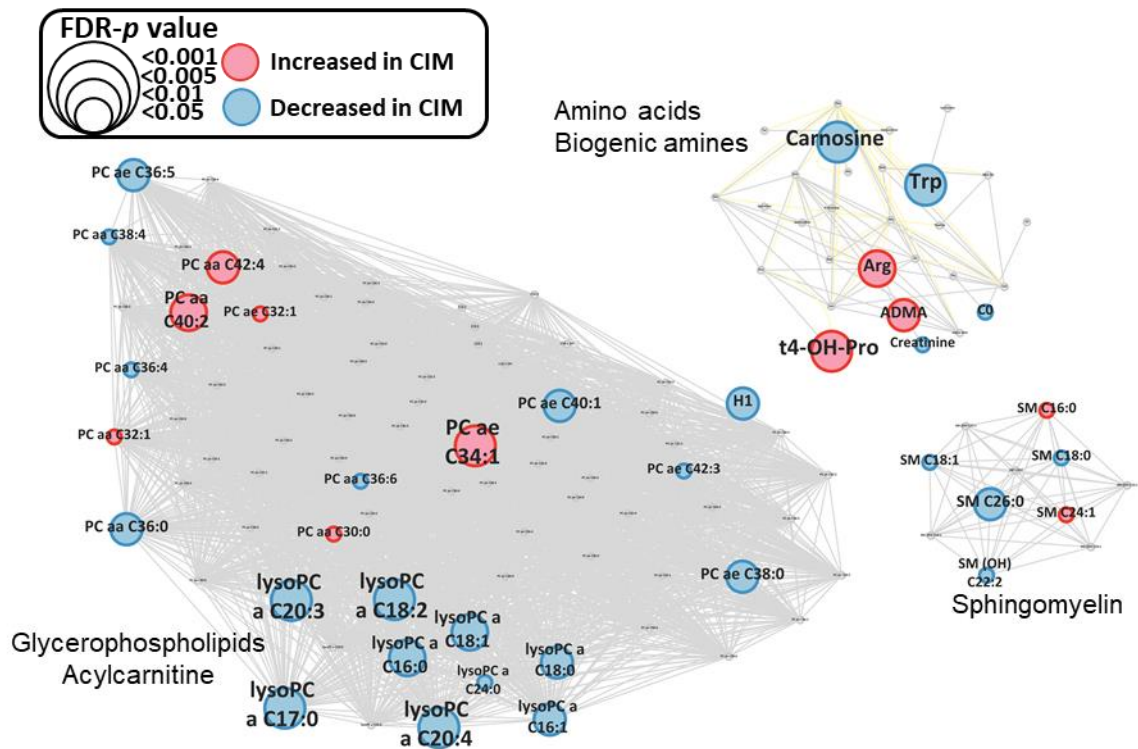

Figure S8. Pathway enrichment dot plot.

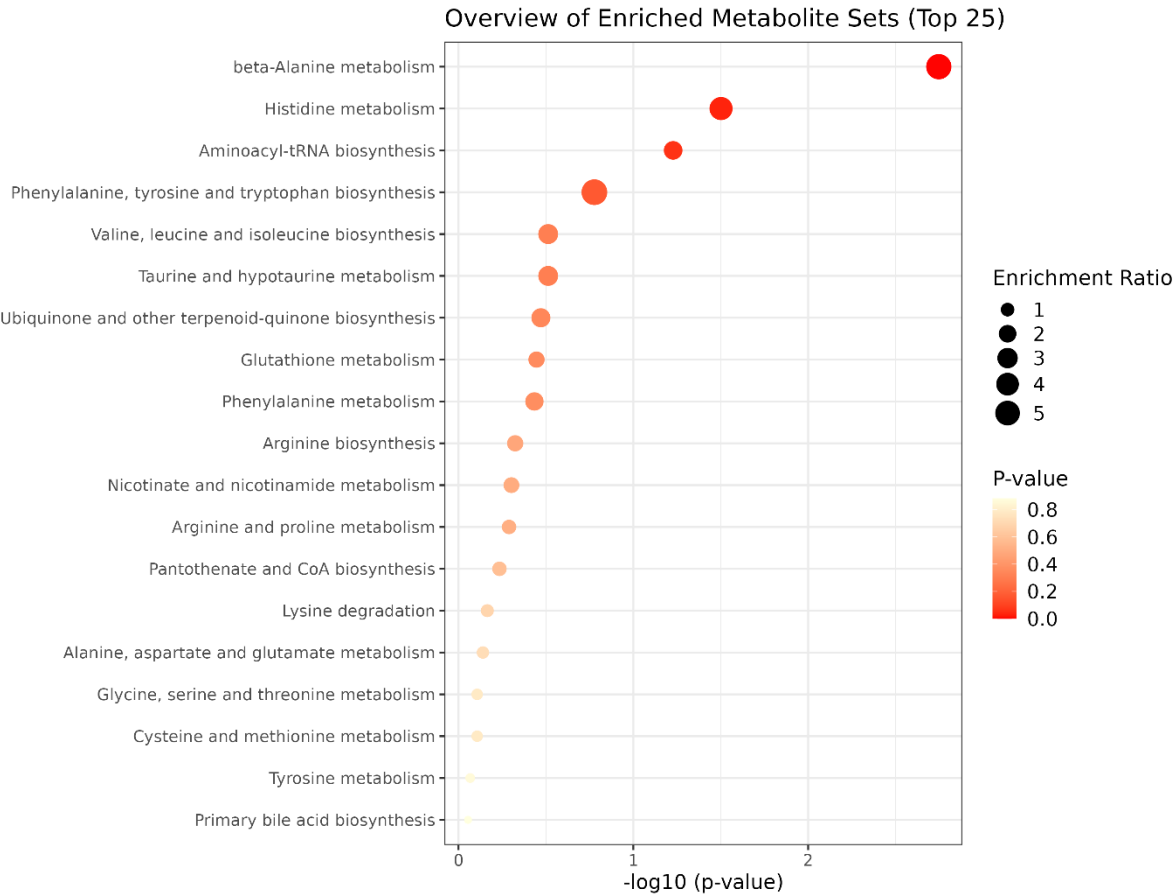

Supplement: s1 [file s1]
